# Supplementary material
Source: MDPI journal article supplement (https://www.mdpi.com/2073-4441/7/5/2275)
Supplement: s1 [file s1]

**Supplementary Information**

**Figure S1.** Percent COD equivalents for glucose degradation and SO42− reduction byproducts. 1. Experiments #1–#9 correspond to experimental conditions outlined in Table 1;
2. DS = dissolved sulfide, H2S = hydrogen sulfide and CH4 = methane. 3. COD distributed towards DS and H2S corresponds to COD distributed towards SO42− reduction.

**Table S1.** Percent relative abundance of bacterial and archeal species in sulfate reducing ASBRs.

| **Phylum** | **Class** | **Genus or Species** | **COD/SO42− Ratio** | **0.8** | **1.6** | **0.8** | **1.6** | **2.4** | **2.4** |
| --- | --- | --- | --- | --- | --- | --- | --- | --- | --- |
| **HRT (h)** | **12** | **36** | **24** | **12** | **36** | **12** |
| **LA (g·L−1)** | **0.0** | **0.0** | **0.5** | **0.5** | **0.5** | **1.0** |
| Uncultured | Uncultured | - | - | 22 | 31.7 | 37.8 | 37.3 | 33.5 | 35.7 |
| *Euryarchaeota* | *Methanobacteria* | *Methanobrevibacter smithii* | - | 0.5 | 8.3 | - | - | - | - |
| *Proteobacteria* | *Delta Proteobacteria* | *Desulfovibrio* sp. | - | 12.3 | - | 19.7 | - | 8.4 | - |
| *Firmicutes* | *Bacilli* | *Lactobacillus* sp. | - | - | 6.5 | - | 10.9 | - | - |
| *Bacteroidetes* | *Bacteroidia* | Uncultured bacteroidia | - | 4 | 7.9 | - | 10.2 | - | - |
| *Euryarchaeota* | *Methanomicrobia* | *Methanococcoides methylutens* | - | 2.2 | 6 | - | - | 2.1 | - |
| *Euryarchaeota* | *Methanomicrobia* | *Methanosaeta concilii* | - | 1.9 | 11.5 | 3.4 | 3.2 | 8.1 | - |
| *Proteobacteria* | *Delta Proteobacteria* | *Desulfovibrio vulgaris* | - | 6.5 | - | 1.4 | 3.1 | 10.2 | 8.1 |
| *Proteobacteria* | *Delta Proteobacteria* | *Geobacter sulfurreducens* | - | 2.1 | 5.9 | 7.8 | - | - | 7.8 |
| *Proteobacteria* | *Delta Proteobacteria* | *Desulfatibacillum alkenivorans* | *-* | 17.2 | 9.9 | 10.5 | 16.4 | 12.2 | 21 |
| *Euryarchaeota* | *Methanomicrobia* | *Methanococcoides burtonii* | - | 0.5 | 5.9 | - | - | - | - |
| *Proteobacteria* | *Delta Proteobacteria* | *Desulfovibrio magneticus* | - | 5.3 | - | - | - | 7.4 | 5.5 |
| *Proteobacteria* | *Delta Proteobacteria* | *Desulfomicrobium baculatum* | - | 5.2 | - | 3.6 | 6.3 | - | 8.8 |
| *Firmicutes* | *Clostridia* | *Dethiosulfovibrio peptidovorans* | - | 8.3 |  | 10 | 5.7 | 4.8 | - |
| *Proteobacteria* | *Deltaproteobacteria* | *Syntrophus aciditrophicus* | - | 6.1 | 3.6 | 2.4 | 3.4 | 7.4 | 6.2 |
| *Firmicutes* | *Clostridia* | *Clostridium* sp. | - | 5.9 | 2.8 | 3.4 | 3.5 | 5.9 | 6.9 |

Notes: Only species with relative abundance of the TRFs > 1% is shown in the table; HRT: hydraulic retention time and LA: linoleic acid.

© 2015 by the authors; licensee MDPI, Basel, Switzerland. This article is an open access article distributed under the terms and conditions of the Creative Commons Attribution license (http://creativecommons.org/licenses/by/4.0/).
